# Supplementary material for: Effects of hydrological regime and land use on in-stream Escherichia coli concentration in the Mekong basin, Lao PDR
Source: PubMed Central journal article supplement (PMC7876097; doi:10.1038/s41598-021-82891-0), 2021-02-10
Supplement: 41598_2021_82891_MOESM1_ESM.pdf [file 41598_2021_82891_MOESM1_ESM.pdf]

## Supplementary Information

### Effects of hydrological regime and land use on in-stream *Escherichia coli* concentration in the Mekong basin, Lao PDR

Paty Nakhle<sup>1</sup>, Olivier Ribolzi<sup>1</sup>, Laurie Boithias<sup>1,\*</sup>, Sayaphet Rattanavong<sup>2</sup>, Yves Auda<sup>1</sup>, Saysongkham Sayavong<sup>3</sup>, Rosalie Zimmermann<sup>2,4,5</sup>, Bounsamay Soullileuth<sup>6</sup>, Anne Pando<sup>6</sup>, Chanthamousone Thammahacksa<sup>6</sup>, Emma J. Rochelle-Newall<sup>7</sup>, William Santini<sup>1</sup>, Jean-Michel Martinez<sup>1</sup>, Nicolas Gratiot<sup>8,9</sup> & Alain Pierret<sup>6</sup>

<sup>1</sup> Géosciences Environnement Toulouse (GET), Université de Toulouse, CNRS, IRD, UPS, Toulouse, France;

<sup>2</sup> Lao-Oxford-Mahosot Hospital-Wellcome Trust Research Unit (LOMWRU), Microbiology Laboratory, Mahosot Hospital, Vientiane, Lao PDR;

<sup>3</sup> Lao Department of Agriculture Land Management (DALaM), Ministry of Agriculture and Forestry, Vientiane, Lao PDR;

<sup>4</sup> Department of Environmental Sciences, University of Basel, Basel, Switzerland;

<sup>5</sup> Department of Medical Microbiology, Amsterdam University Medical Centers (UMC), Amsterdam, The Netherlands;

<sup>6</sup> Institut de Recherche pour le Développement (IRD), iEES-Paris, UMR 242 (IRD, SU-UPMC, CNRS, INRA, Univ. de Paris, UPEC), PO Box 5992, Vientiane, Lao PDR;

<sup>7</sup> Institute of Ecology and Environmental Sciences of Paris (iEES-Paris), Sorbonne Université, Univ Paris Est Creteil, IRD, CNRS, INRA, Paris, France;

<sup>8</sup> Univ. Grenoble Alpes, CNRS, IRD, Grenoble INP, IGE, F-38000, Grenoble, France;

<sup>9</sup> Asian Research Center on Water (CARE-Rescif), Ho Chi Minh City University of Technology, Block B7, 268 Ly Thuong Kiet Street, District 10, Ho Chi Minh City, Viet Nam.

\* Corresponding author: [laurie.boithias@get.omp.eu](mailto:laurie.boithias@get.omp.eu)

**Table S1:** Summary of geographical and meteorological characteristics per group of sampled watersheds in Lao PDR. Altitude (m a.m.s.l.), slope (%), areal percentages of: forest (%), unstocked forest (%), paddy rice (%), other agriculture (OA, %), grassland (%), water (%), and urban (%), dams' reservoir area (Dams, ha), human density (HD, people ha<sup>-1</sup>), livestock density (LD, animal ha<sup>-1</sup>), rainfall during rainy season (mm week<sup>-1</sup>) one week preceding the sampling in July 2016.

| Sampling sites | Altitude<br>(m a.m.s.l.) | Slope<br>(%) | Forest<br>(%) | Unstocked forest<br>(%) | Paddy rice<br>(%) | OA<br>(%) | Grass-land<br>(%) | Water<br>(%) | Urban<br>(%) | Dams<br>(ha) | HD<br>(people ha <sup>-1</sup> ) | LD<br>(animal ha <sup>-1</sup> ) | Rainfall rainy season<br>(mm week <sup>-1</sup> ) |
|----------------|--------------------------|--------------|---------------|-------------------------|-------------------|-----------|-------------------|--------------|--------------|--------------|----------------------------------|----------------------------------|---------------------------------------------------|
| Nou            | 887                      | 30           | 30.7          | 56.6                    | 0.1               | 2.9       | 2.7               | 1.4          | 0            | 1,570        | 0.2                              | 0.4                              | 108                                               |
| Nsu            | 839                      | 32.7         | 21.9          | 72.9                    | 0                 | 1.5       | 3.3               | 0.2          | 0            | 0            | 0.1                              | 0.5                              | 88                                                |
| Npa            | 900                      | 33.9         | 13.9          | 78.9                    | 0.1               | 3.6       | 3.6               | 0            | 0            | 0            | 0.2                              | 0.6                              | 107                                               |
| Nk20           | 950                      | 31.6         | 31.8          | 56.3                    | 0                 | 3.3       | 8.4               | 0.1          | 0            | 3,056        | 0.2                              | 0.5                              | 124                                               |
| A6             | 820                      | 30.3         | 18.8          | 74                      | 0.6               | 4.4       | 2.2               | 0            | 0            | 0            | 0.3                              | 0.8                              | 128                                               |
| Nmi            | 345                      | 13.9         | 31            | 47.1                    | 4.8               | 16.6      | 0.3               | 0            | 0            | 0            | 0.2                              | 0.6                              | 128                                               |
| Nsa            | 325                      | 13.5         | 33.3          | 56.7                    | 1.8               | 8         | 0                 | 0.1          | 0            | 0            | 0.4                              | 0.9                              | 175                                               |
| Ntho           | 235                      | 5.62         | 25.6          | 60.1                    | 9.5               | 4.7       | 0                 | 0.2          | 0            | 0            | 0.3                              | 1.5                              | 206                                               |
| Nlik           | 522                      | 24.1         | 51.5          | 33.8                    | 2.3               | 6.7       | 4.6               | 1.1          | 0            | 24,40        | 0.2                              | 0.7                              | 175                                               |
| Nng_1          | 631                      | 18.3         | 33            | 41.6                    | 5.2               | 7.8       | 6.9               | 5.1          | 0.3          | 37,000       | 0.4                              | 1.5                              | 161                                               |
| Nma            | 596                      | 14.2         | 49.9          | 41.4                    | 1.1               | 1.4       | 3.5               | 1.8          | 0.1          | 1,720        | 0.1                              | 0.9                              | 203                                               |
| Ngn            | 990                      | 25.4         | 31.8          | 51.5                    | 0.6               | 4.1       | 7.6               | 4.4          | 0            | 0            | 0.1                              | 0.7                              | 117                                               |
| Nxa            | 373                      | 21.5         | 55.6          | 39                      | 2.2               | 1.8       | 0.8               | 6.5          | 0            | 12,300       | 0.2                              | 0.6                              | 143                                               |
| Nka            | 707                      | 24.2         | 60.2          | 28                      | 0.5               | 1         | 2.9               | 0.5          | 0            | 0            | 0.1                              | 0.3                              | 69                                                |
| Nhi            | 310                      | 16           | 31.1          | 27.6                    | 5.3               | 1.1       | 2.7               | 1.7          | 0            | 0            | 0.2                              | 0.4                              | 83                                                |
| Xbi            | 246                      | 8.6          | 44            | 32.1                    | 5.5               | 1.7       | 3.4               | 0.3          | 0            | 0            | 0.2                              | 0.4                              | 97                                                |
| Xbg            | 237                      | 4.7          | 44.9          | 36.8                    | 9                 | 1.9       | 2.3               | 1.2          | 0            | 0            | 0.3                              | 0.5                              | 126                                               |
| Xbn            | 278                      | 5.4          | 70.2          | 23.5                    | 3                 | 1.1       | 1.6               | 0.5          | 0            | 0            | 0.1                              | 0.7                              | 152                                               |
| SR             | 244                      | 3.4          | 44.9          | 17.2                    | 16.9              | 19.5      | 0.9               | 0.3          | 0.2          | 55           | 0.7                              | 0.9                              | 172                                               |

**Table S2:** Model quality by number of components, the first component (Comp1) and the second component (Comp2) of the PLS analyses for dry and rainy seasons. The  $Q^2$  cumulated ( $Q^2$  cum) index measures the global contribution of the first two components to the predictive quality of the model. The  $R^2Y$  cumulated ( $R^2Y$  cum) index represents the sum of the coefficients of determination between the dependent variables and the two first components. The  $R^2X$  cumulated ( $R^2X$  cum) index is the sum of the coefficients of determination between the explanatory variables and the two first components.

| <b>Dry season</b>            |              |              |
|------------------------------|--------------|--------------|
| <b>Statistics</b>            | <b>Comp1</b> | <b>Comp2</b> |
| <b><math>Q^2</math> cum</b>  | 0.290        | -0.297       |
| <b><math>R^2Y</math> cum</b> | 0.568        | 0.787        |
| <b><math>R^2X</math> cum</b> | 0.208        | 0.291        |
| <b>Rainy season</b>          |              |              |
| <b>Statistics</b>            | <b>Comp1</b> | <b>Comp2</b> |
| <b><math>Q^2</math> cum</b>  | 0.481        | 0.477        |
| <b><math>R^2Y</math> cum</b> | 0.657        | 0.841        |
| <b><math>R^2X</math> cum</b> | 0.178        | 0.292        |

**Table S3:** Spearman correlation coefficients between *E. coli* concentration ([*E. coli*], MPN 100 mL<sup>-1</sup>), total suspended sediment concentration ([TSS], g L<sup>-1</sup>), electrical conductivity (EC,  $\mu$ S cm<sup>-1</sup>), water level (m), and rainfall (Rainfall, mm day<sup>-1</sup>), measured from July 2017 to December 2018 at the outlet of three watersheds in northern Lao PDR: Nam Ou (Nou), Nam Suang (Nsu), and Mekong (MK\_17). Values in bold letters indicate significant correlation ( $p < 0.05$ ).

| <b>Nou</b>   |                    |              |              |             |
|--------------|--------------------|--------------|--------------|-------------|
|              | [ <i>E. coli</i> ] | [TSS]        | EC           | Water level |
| [TSS]        | <b>0.45</b>        | -            |              |             |
| EC           | <b>-0.55</b>       | <b>-0.76</b> | -            |             |
| Water level  | <b>0.52</b>        | <b>0.86</b>  | <b>-0.82</b> | -           |
| Rainfall     | 0.24               | 0.25         | -0.17        | 0.25        |
| <b>Nsu</b>   |                    |              |              |             |
|              | [ <i>E. coli</i> ] | [TSS]        | EC           | Water level |
| [TSS]        | <b>0.66</b>        | -            |              |             |
| EC           | <b>-0.72</b>       | <b>-0.68</b> | -            |             |
| Water level  | <b>0.72</b>        | <b>0.77</b>  | <b>-0.85</b> | -           |
| Rainfall     | <b>0.62</b>        | <b>0.51</b>  | <b>-0.50</b> | <b>0.49</b> |
| <b>MK_17</b> |                    |              |              |             |
|              | [ <i>E. coli</i> ] | [TSS]        | EC           | Water level |
| [TSS]        | <b>0.44</b>        | -            |              |             |
| EC           | <b>-0.30</b>       | <b>-0.60</b> | -            |             |
| Water level  | <b>0.48</b>        | <b>0.71</b>  | <b>-0.79</b> | -           |
| Rainfall     | <b>0.31</b>        | <b>0.41</b>  | <b>-0.33</b> | <b>0.36</b> |

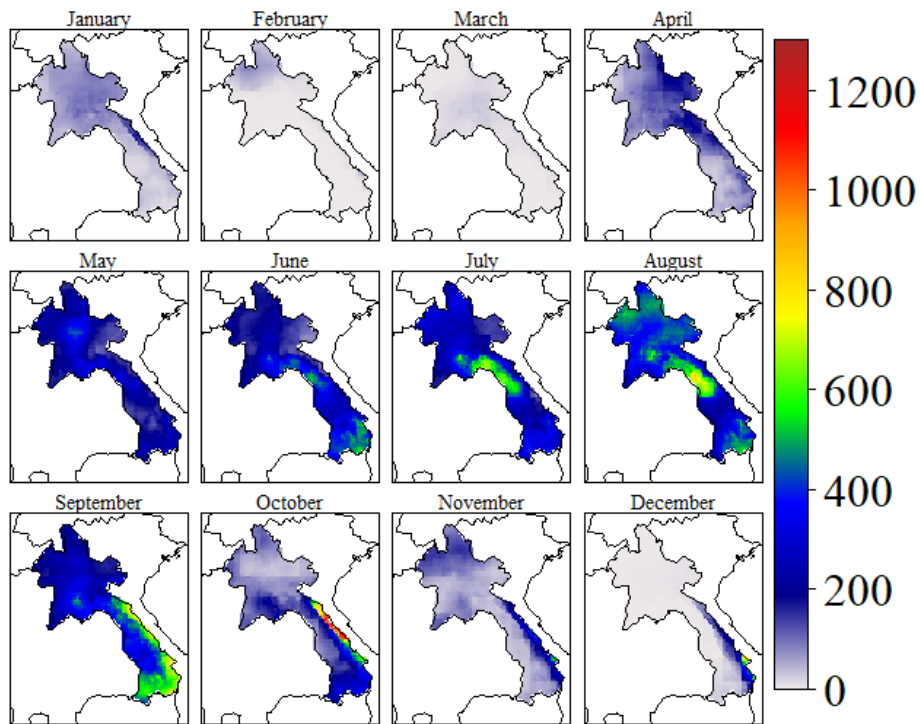

**Figure S1:** Spatial distribution of the cumulated rainfall ( $\text{mm month}^{-1}$ ) during 2016 over Lao PDR, obtained from the Multi-Source Weighted-Ensemble Precipitation (MSWEP V2) data. Maps were generated using the “raster” package (<https://rspatial.org/raster/>) and “maptools” package (<http://maptools.r-forge.r-project.org/>) implemented in R (version 1.2.1335; <http://www.r-project.org>).
